# Supplementary material for: Characterization of the Apoptotic and Antimicrobial Activities of Two Initiator Caspases of Sea Cucumber Apostichopus japonicus
Source: MDPI journal article supplement (doi:10.3390/genes15050540), 2024-04-25

## **Supplementary Materials**

### **This file include:**

Table S1. Primers used in this study.

Figure S1. Phylogenetic analysis of AjCASPX1/2 with human and mouse caspases.

Figure S2. Preparation of recombinant proteins.

**Table S1. Primers used in this study.**

| Primers                                     | Sequence (5'-3')                                      |
|---------------------------------------------|-------------------------------------------------------|
| <b>For gene cloning</b>                     |                                                       |
| AjCASPX1 forward                            | ATGGAGGACCTTCACAGGA                                   |
| AjCASPX1 reverse                            | TCATTTTCTTACATAACCAGGAAAG                             |
| AjCASPX2 forward                            | ATGGACCCACGGCACAG                                     |
| AjCASPX2 reverse                            | TTAGCATGATTCTTGTAGAGGCATG                             |
| <b>For expression in HEK293T</b>            |                                                       |
| AjCASPX1-pCAGGS-N-FLAG forward              | GATGACGACGATAAGGAATTCATGGAGG<br>ACCTTCACAGGA          |
| AjCASPX1-pCAGGS-N-FLAG reverse              | AATTAATTAAGATCTGCTAGCTCATTTTCT<br>TACATAACCAGGAAAG    |
| AjCASPX2-pCAGGS-N-FLAG forward              | GATGACGACGATAAGGAATTCATGGACCC<br>ACGGCACAG            |
| AjCASPX2-pCAGGS-N-FLAG reverse              | AATTAATTAAGATCTGCTAGCTCAAGAGG<br>ATGGTTGTACTGAACGTTTC |
| <b>For expression in <i>E. coli</i></b>     |                                                       |
| AjCASPX1-pET30a(+) forward                  | TAAGAAGGAGATATACATATGGGTGTCTG<br>GCCAAATCC            |
| AjCASPX1-pET30a(+) reverse                  | GTGGTGGTGGTGGTGCTCGAGTTTTCTTA<br>CATAACCAGGAAAG       |
| AjCASPX2 -pET30a(+)forward                  | TAAGAAGGAGATATACATATGCAATATCCA<br>AGAGATGAGACAGATC    |
| AjCASPX2 -pET30a(+) reverse                 | GTGGTGGTGGTGGTGCTCGAGAGAGGAT<br>GGTTGTACTGAACGTTTC    |
| CARD <sub>AjCASPX2</sub> -pET30a(+)forward  | TAAGAAGGAGATATACATATGATGGACCC<br>ACGGCACAG            |
| CARD <sub>AjCASPX2</sub> -pET30a(+) reverse | GTGGTGGTGGTGGTGCTCGAGACTTGCA                          |

TCTTGACCAGCCT

**For Real-time PCR expression analysis**

|                              |                        |
|------------------------------|------------------------|
| AjCASPX1-RT forward          | TTCAAGGCCAAAGGTGGGAAG  |
| AjCASPX1-RT reverse          | CAGCATCAGTCGGGTGTGAA   |
| AjCASPX2-RT forward          | CACAGCATGAAATTGCGCGT   |
| AjCASPX2-RT reverse          | TCTCGCCTGGGCATTGATTC   |
| Aj $\beta$ -actin-RT forward | CCATTCAACCCTAAAGCCAACA |
| Aj $\beta$ -actin-RT reverse | ACACACCGTCTCCTGAGTCCAT |

---

**Figure S1. Phylogenetic analysis of AjCASPX1/2 with human and mouse caspases.** The phylogenetic tree was constructed with WAG+F+I+G4 model implement in IQ-TREE 2 v.2.1.2. The values at the forks indicate the percentage of trees in which this grouping occurred after bootstrapping (1000 replicates). Scale bar, the number of substitutions per base. The accession numbers of the listed protein sequences are as follows: *Homo sapiens* CASP1 (NP\_001244047.1), *Mus musculus* CASP1 (NP\_033937.2), *Homo sapiens* CASP2 (NP\_116764.2), *Mus musculus* CASP2 (NP\_031636.1), *Homo sapiens* CASP3 (XP\_003823509.1), *Mus musculus* CASP3 (NP\_001271338.1), *Homo sapiens* CASP4 (NP\_001216.1), *Mus musculus* CASP4 (NP\_001366247.1), *Homo sapiens* CASP5 (NP\_004338.3), *Homo sapiens* CASP6 (NP\_001217.2), *Mus musculus* CASP6 (NP\_033941.3), *Homo sapiens* CASP7 (NP\_001218.1), *Mus musculus* CASP7 (NP\_031637.1), *Homo sapiens* CASP8 (NP\_001073593.1), *Mus musculus* CASP8 (NP\_001073595.1), *Homo sapiens* CASP9 (NP\_001220.2), *Mus musculus* CASP9 (NP\_056548.2), *Homo sapiens* CASP10 (NP\_116756.2), *Mus musculus* CASP11 (CAA73531.1)

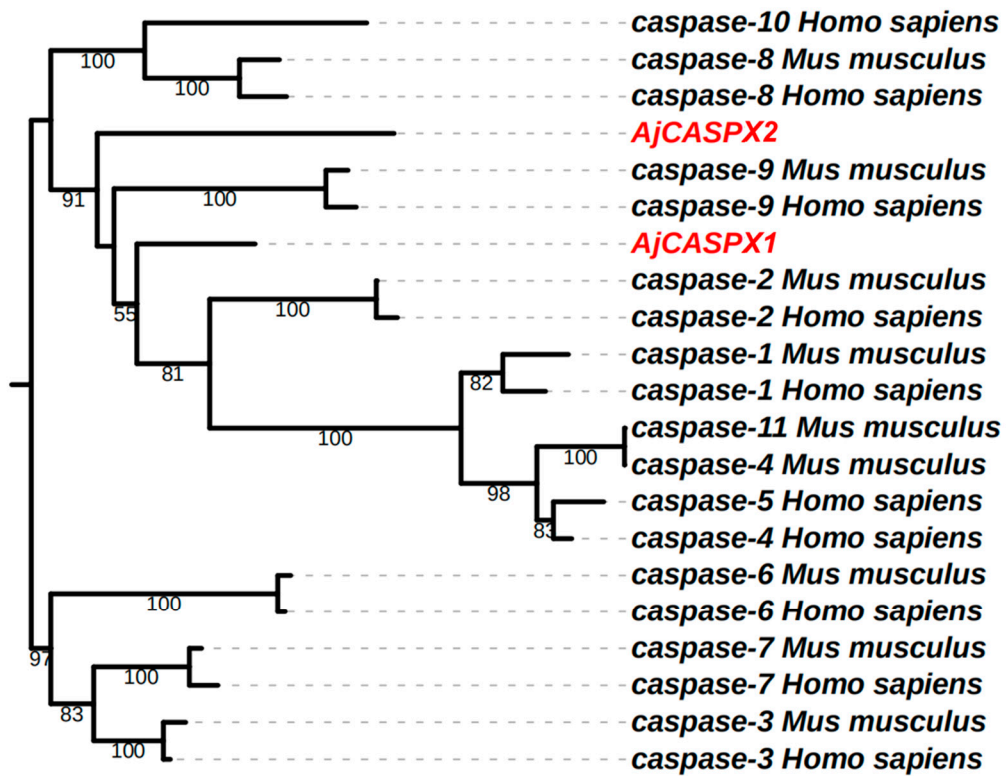

Tree scale: 1

**Figure S2. Preparation of recombinant proteins. SDS-PAGE analysis of purified AjCASPX2**

(A) and CARD<sub>AjCASPX2</sub> (B).

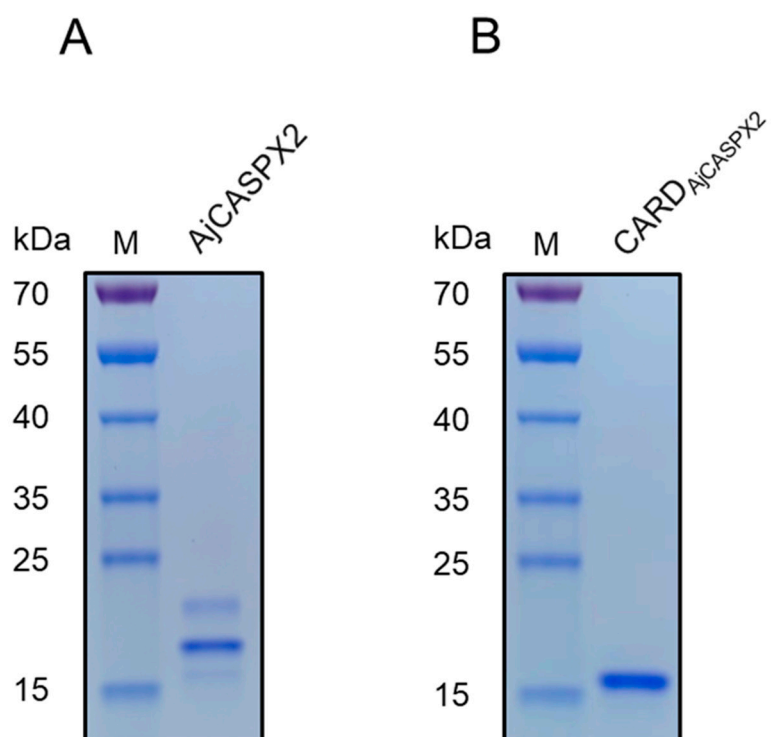

Supplement: s1 [file s1]
